# Supplementary material for: β-Arrestin1/miR-326 Transcription Unit Is Epigenetically Regulated in Neural Stem Cells Where It Controls Stemness and Growth Arrest
Source: Hindawi journal article supplement (doi:10.1155/2017/5274171), 2017-01-01

## **Supplementary Figure Legends**

### **Supplementary Figure 1.**

Detailed report of  $\beta$ -arrestin1 regulatory sequence: the analyzed CpG by methylation specific PCR are evidenced in light blue. The first exon is depicted in blue.

### **Supplementary Figure 2.**

A. miR-326 levels in NSC after ectopic expression of miR-326. \*  $p < 0.05$

B. Oncosphere forming assay (number of colonies, left panel) in NSC after ectopic expression of miR-326. \*  $p < 0.05$

C. Cell viability (MTT assay) in NSC after ectopic expression of miR-326. \*  $p < 0.05$

Data in A-C are means $\pm$ SD from 3 independent experiments.



**A**

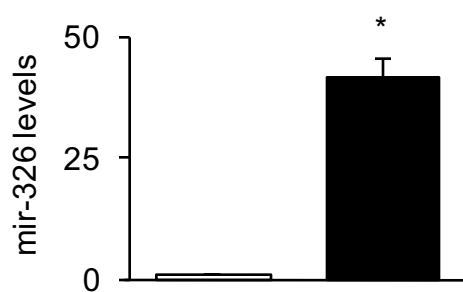

**B**

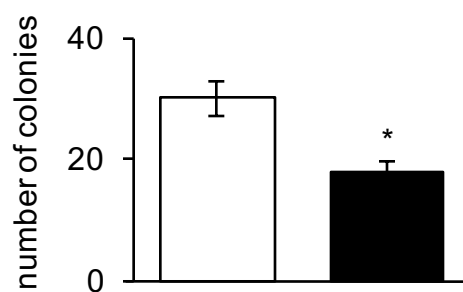

**C**

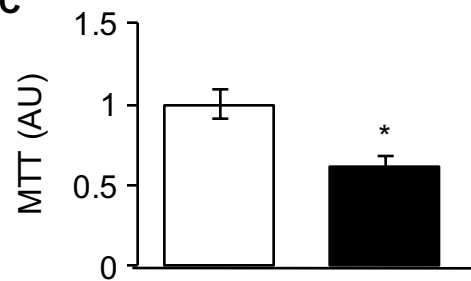

Supplement: f1 [file 5274171.f1.pdf]
